# Supplementary material for: Natural selection mediated by seasonal time constraints increases the alignment between evolvability and developmental plasticity
Source: PubMed Central journal article supplement (PMC7986058; doi:10.1111/evo.14147), 2021-01-06
Supplement: EVO-75-464-s001.pdf [file EVO-75-464-s001.pdf]

# 1 **Supporting Information, Johansson et al.**

## 2 **Natural selection mediated by seasonal time** 3 **constraints increases the alignment between** 4 **evolvability and developmental plasticity.**

### 6 **Supplementary 1**

7  
8 After catching the mated females were individually put in a small plastic cups with a lid. Each cup had  
9 a moist filter paper aligned at the inside of cup wherein the female oviposited the eggs after 1-3 days.  
10 The eggs were then transported to a laboratory. Upon arrival to the laboratory the eggs were  
11 introduced in the climate chambers where they were overwintered and reared in three climate  
12 chambers, one with southern thermo-photoperiod, one with central thermo-photoperiod and one with  
13 northern thermo-photoperiod. Half of the southern eggs and half of the northern eggs were reared in  
14 the southern climate chamber and the other halves were reared in the northern climate chamber. All  
15 the central eggs were reared in the central climate chamber. This resulted in five groups;  
16 Southern/native, Central/native, Northern/native, Southern/northern, and Northern/southern (the  
17 groups are named after the pattern latitude/photoperiod).

18  
19 The climate chambers had temperature and photoperiods that simulating the time of the year (late  
20 summer) at their respective region of collection (south, central and north). The temperatures used  
21 during the experiment were derived from Flake model (Lake Model Flake, 2009). Simulation of  
22 winter conditions, temperature 7 °C and photoperiod L-D 00:00-24:00, started on 4, 5 and 7  
23 September 2018 for southern, central and northern latitude populations, respectively, and ended on 20  
24 November 2018 for the three latitude populations. We initiated spring conditions dates when water  
25 temperature exceeds 10 °C at each sampling latitude because a threshold temperature for spring  
26 hatching in *L. sponsa* is 10 °C (Corbet, 1956). On 20 November 2018, we programmed southern  
27 region conditions for 10.9 °C, L-D 14:56-09:04, which corresponded to 12 April 2019, central region  
28 conditions for 10.6 °C and L-D 17:04-06:56, which corresponded to 26 April 2019, and northern  
29 region conditions for 10.6 °C and L-D 24:00-00:00, which corresponded to 24 May 2019. From these  
30 dates, we started simulating weekly changes of spring and summer temperatures and photoperiods  
31 until the end of the experiment, that is, when the last larva emerged.

32  
33 During spring conditions, all eggs hatched after about ten days. The larvae were reared individually in  
34 200 ml round plastic cups filled with 100 ml of aged tap water and fed twice a day (morning and  
35 afternoon feeding) between Monday-Friday and once a day between Saturday-Sunday with laboratory  
36 cultured *Artemia nauplii*, (mean 215 nauplii/fed, SE = 7, N = 10). When entering into one prior final  
37 instar, the larval feeding was supplemented with three standard-size life midge larvae every Monday,  
38 Wednesday and Friday. The day after emergence, individuals were weighed and then preserved in  
39 ethanol. Six offspring from each female was raised. However, only 1-2 individuals per female were  
40 later measured. This resulted in a total of 1156 larvae at the start of the experiment. The following

41 traits were measured on emerged adults: larval development time between hatching and emergence,  
 42 adult body mass at emergence, head width, thorax length, thorax width, abdomen length, tibia length  
 43 and wing length. For the tibia length, the tibia from the third leg on the right side was measured. For  
 44 the wing length, the posterior right wings were measured. For exact measurement points, see Figure  
 45 S1 in supplement.

46

47 In our statistical analysis we assume that the offspring are full-sibs. First, sperm precedence, the  
 48 fraction of female eggs fertilized by the last male to copulate with a female is variable in damselflies  
 49 but rarely less than 95% (Corbet 1999, page 521). But an unpublished study suggests that this  
 50 percentage might be somewhat variable (Johansson et al. 2020) in *L. sponsa*. Maternal effects on  
 51 larval life history traits was found to be less than 1% in a previous study (Sniegula et al 2016).

52

53

## Supplementary 2

54

55 Table S1. Photoperiod and temperature used for each latitude treatment in the experiment  
 56 simulating the progress of the season at each latitude. The first column is the date used  
 57 simulating the actual photoperiod and temperature. L denotes light of and D denotes light  
 58 on, and temp is the temperature used.

| POLAND: 53.651 N, 16.343 E |       |       |           | SWEDEN: 59.84 N, 17.66 E |       |       |           | SWEDEN: 65.701 N, 21.872 E |          |       |           |
|----------------------------|-------|-------|-----------|--------------------------|-------|-------|-----------|----------------------------|----------|-------|-----------|
| 2019                       | L     | D     | temp. + 3 | 2019                     | L     | D     | temp. + 3 | 2019                       | L        | D     | temp. + 3 |
| 19-04-12                   | 14:56 | 09:04 | 10,9      | 19-04-26                 | 17:04 | 06:56 | 10,6      | 19-05-24                   | 24:00:00 | 00:00 | 10,6      |
| 19-04-19                   | 15:28 | 08:32 | 12,6      | 19-05-03                 | 17:48 | 06:12 | 13,7      | 19-05-31                   | 24:00:00 | 00:00 | 15        |
| 19-04-26                   | 15:59 | 08:01 | 14,3      | 19-05-10                 | 18:32 | 05:28 | 14,9      | 19-06-07                   | 24:00:00 | 00:00 | 17,3      |
| 19-05-03                   | 16:30 | 07:30 | 17,1      | 19-05-17                 | 19:17 | 04:43 | 16,2      | 19-06-14                   | 24:00:00 | 00:00 | 18,1      |
| 19-05-10                   | 17:00 | 07:00 | 18,2      | 19-05-24                 | 20:01 | 03:59 | 17,1      | 19-06-21                   | 24:00:00 | 00:00 | 18,6      |
| 19-05-17                   | 17:28 | 06:32 | 18,2      | 19-05-31                 | 20:45 | 03:15 | 17,9      | 19-06-28                   | 24:00:00 | 00:00 | 20,3      |
| 19-05-24                   | 17:54 | 06:06 | 19,2      | 19-06-07                 | 21:25 | 02:35 | 18,9      | 19-07-05                   | 24:00:00 | 00:00 | 21,5      |
| 19-05-31                   | 18:16 | 05:44 | 17,2      | 19-06-14                 | 21:57 | 02:03 | 19,7      | 19-07-12                   | 24:00:00 | 00:00 | 21,2      |
| 19-06-07                   | 18:34 | 05:26 | 21,1      | 19-06-21                 | 22:13 | 01:47 | 20,3      | 19-07-19                   | 24:00:00 | 00:00 | 21,2      |
| 19-06-14                   | 18:46 | 05:14 | 20,6      | 19-06-28                 | 22:05 | 01:55 | 20,7      | 19-07-26                   | 24:00:00 | 00:00 | 20,7      |
| 19-06-21                   | 18:51 | 05:09 | 21,5      | 19-07-05                 | 21:38 | 02:22 | 21,9      | 19-08-02                   | 22:51    | 01:08 | 20,6      |
| 19-06-28                   | 18:48 | 05:12 | 22        | 19-07-12                 | 21:01 | 02:59 | 23,1      | 19-08-09                   | 20:40    | 03:20 | 20,2      |
| 19-07-05                   | 18:39 | 05:21 | 22,2      | 19-07-19                 | 20:18 | 03:42 | 23,1      | 19-08-16                   | 19:19    | 04:41 | 19        |
| 19-07-12                   | 18:24 | 05:36 | 22,8      | 19-07-26                 | 19:35 | 04:25 | 22,5      | 19-08-23                   | 18:10    | 05:50 | 17,5      |
| 19-07-19                   | 18:03 | 05:57 | 22,8      | 19-08-02                 | 18:49 | 05:11 | 22,8      | 19-08-30                   | 17:08    | 06:52 | 16,2      |
| 19-07-26                   | 17:38 | 06:22 | 22,9      | 19-08-09                 | 18:05 | 05:55 | 22,2      | 19-09-06                   | 16:12    | 07:48 | 14,9      |
| 19-08-02                   | 17:12 | 06:48 | 23,7      | 19-08-16                 | 17:22 | 06:38 | 21,6      | 19-09-13                   | 15:17    | 08:43 | 13,5      |
| 19-08-09                   | 16:42 | 07:18 | 23,1      | 19-08-23                 | 16:40 | 07:20 | 20,5      | 19-09-20                   | 14:26    | 09:34 | 11,2      |
| 19-08-16                   | 16:12 | 07:48 | 21,8      | 19-08-30                 | 15:58 | 08:02 | 19,1      | 19-09-27                   | 13:35    | 10:25 | 10        |
| 19-08-23                   | 15:41 | 08:19 | 21,6      | 19-09-06                 | 15:16 | 08:44 | 17,7      | 19-10-04                   | 12:47    | 11:13 | 7,9       |
| 19-08-30                   | 15:11 | 08:49 | 20,7      | 19-09-13                 | 14:37 | 09:23 | 16,8      | 19-10-11                   | 12:00    | 12:00 | 6,3       |
| 19-09-06                   | 14:39 | 09:21 | 19,1      | 19-09-20                 | 13:58 | 10:02 | 14,9      | 19-10-18                   | 11:13    | 12:47 | 5,1       |
| 19-09-13                   | 14:08 | 09:52 | 18,8      | 19-09-27                 | 13:19 | 10:41 | 14        | 19-10-25                   | 10:27    | 13:33 | 3,7       |
| 19-09-20                   | 13:38 | 10:22 | 16,8      | 19-10-04                 | 12:41 | 11:19 | 12,5      | 19-11-01                   | 09:44    | 14:16 | 3,1       |
| 19-09-27                   | 13:08 | 10:52 | 15,6      | 19-10-11                 | 12:05 | 11:55 | 11,1      |                            |          |       |           |
| 19-10-04                   | 12:38 | 11:22 | 14,7      | 19-10-18                 | 11:29 | 12:31 | 9,1       |                            |          |       |           |
| 19-10-11                   | 12:09 | 11:51 | 13,1      | 19-10-25                 | 10:53 | 13:07 | 7,8       |                            |          |       |           |

59

60

61

62

63

64

65

66

67

### Supplementary 3

68

69

70

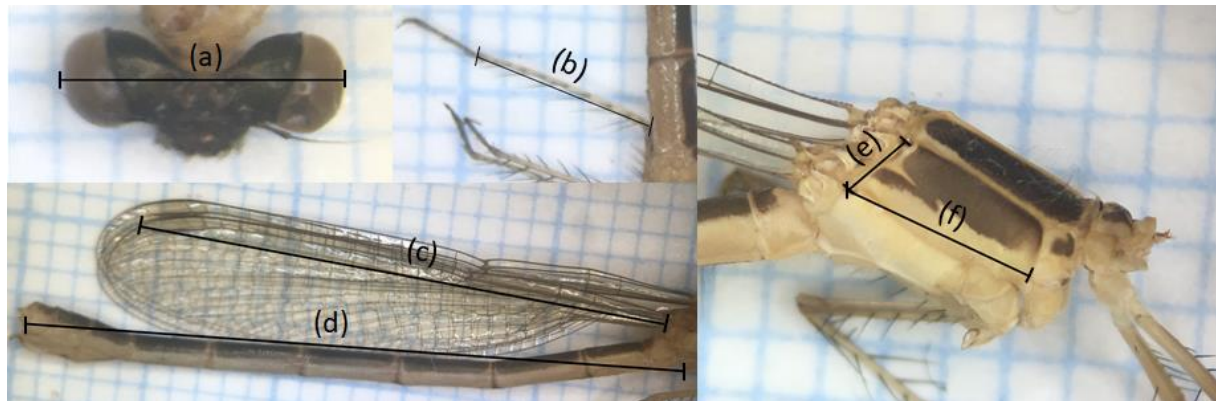

71

72 Figure S1. Morphological measurements on *Lestes sponsa*: (a) head width, (b) tibia length, (c) wing

73 length, (d) abdomen length, (e) thorax width, (f) thorax width

74

75

76

77  
78  
79  
80  
81  
82  
83  
84  
85  
86  
87  
88  
89  
90  
91  
92  
93  
94  
95  
96  
97  
98  
99  
100  
101  
102  
103  
104  
105  
106  
107  
108  
109  
110  
111  
112  
113  
114  
115  
116  
117  
118  
119  
120  
121  
122  
123  
124  
125  
126  
127  
128  
129  
130

## SUPPLEMENTARY 4

### Test of latitudinal variation in the four traits

#### # DEVELOPMENT TIME

```
lmer(devtimeM ~ sex+latitude + (0+sex|female)+  
(1|pop),na.action=na.exclude,data=cryp2)->moddev
```

Random effects:

| Groups | Name        | Variance  | Std.Dev. | Corr |
|--------|-------------|-----------|----------|------|
| female | sexf        | 1.967e-03 | 0.044349 |      |
|        | sexm        | 1.630e-03 | 0.040369 | 0.94 |
| pop    | (Intercept) | 1.492e-06 | 0.001222 |      |
|        | Residual    | 2.321e-03 | 0.048178 |      |

Number of obs: 615, groups: female, 118; pop, 7

Fixed effects:

|             | Estimate   | Std. Error | t value |
|-------------|------------|------------|---------|
| (Intercept) | 2.0320376  | 0.0518554  | 39.187  |
| sexm        | -0.0181672 | 0.0046649  | -3.894  |
| latitude    | -0.0172658 | 0.0008674  | -19.905 |

Analysis of Deviance Table (Type II Wald F tests with Kenward-Roger df)

Response: devtimeM

|          | F      | Df | Df.res  | Pr(>F)        |
|----------|--------|----|---------|---------------|
| sex      | 15.03  | 1  | 100.573 | 0.0001888 *** |
| latitude | 367.25 | 1  | 3.999   | 4.38e-05 ***  |

#### #BODY MASS

```
lmer(log(massM) ~ sex+latitude + (0+sex|female)+ (1|pop)  
,na.action=na.exclude,data=cryp2)->modmass
```

Random effects:

| Groups | Name        | Variance | Std.Dev. | Corr |
|--------|-------------|----------|----------|------|
| female | sexf        | 0.002342 | 0.04839  |      |
|        | sexm        | 0.003353 | 0.05790  | 0.60 |
| pop    | (Intercept) | 0.000374 | 0.01934  |      |
|        | Residual    | 0.006498 | 0.08061  |      |

Number of obs: 578, groups: female, 118; pop, 7

Fixed effects:

|             | Estimate  | Std. Error | t value |
|-------------|-----------|------------|---------|
| (Intercept) | 1.075832  | 0.111826   | 9.621   |
| sexm        | -0.104269 | 0.008941   | -11.662 |
| latitude    | -0.017637 | 0.001855   | -9.510  |

Analysis of Deviance Table (Type II Wald F tests with Kenward-Roger df)

```

131
132 Response: log(massM)
133           F Df  Df.res    Pr(>F)
134 sex      134.837  1 101.188 < 2.2e-16 ***
135 latitude  88.229  1   4.681 0.0003269 ***
136

```

137 **#WING LENGTH**

```

138
139 lmer(WingM ~ sex+latitude + (0+sex|female)+ (1|pop),
140 na.action=na.exclude,data=cryp2)->modwing
141

```

```

142 Random effects:
143   Groups   Name          Variance Std.Dev. Corr
144   female  sexf           0.0002662 0.01631
145           sexm           0.0003456 0.01859 0.65
146   pop     (Intercept) 0.0000000 0.00000
147   Residual                0.0009647 0.03106
148 Number of obs: 554, groups:  female, 118; pop, 7
149

```

```

150 Fixed effects:
151           Estimate Std. Error t value
152 (Intercept) 1.3966281 0.0237366  58.84
153 sexm        -0.0611600 0.0033125 -18.46
154 latitude    -0.0062830 0.0003968 -15.84
155

```

156 Analysis of Deviance Table (Type II Wald F tests with Kenward-Roger df)

```

157
158 Response: WingM
159           F Df  Df.res    Pr(>F)
160 sex      336.43  1 100.072 < 2.2e-16 ***
161 latitude 230.97  1   4.053 0.0001001 ***
162

```

164 **#METRIC SIZE**

```

165
166 lmer(SIZE ~ sex+latitude + (0+sex|female)+
167 (1|pop),na.action=na.exclude,data=cryp2)->modSIZE
168

```

```

169 Random effects:
170   Groups   Name          Variance Std.Dev. Corr
171   female  sexf           1.475e-04 0.012146
172           sexm           3.315e-04 0.018208 0.90
173   pop     (Intercept) 1.377e-05 0.003711
174   Residual                8.080e-04 0.028426
175 Number of obs: 554, groups:  female, 118; pop, 7
176

```

```

177 Fixed effects:
178           Estimate Std. Error t value
179 (Intercept) 1.3543317 0.0273614  49.498
180 sexm        -0.0234780 0.0028892  -8.126
181 latitude    -0.0058231 0.0004553 -12.789
182

```

183 Analysis of Deviance Table (Type II Wald F tests with Kenward-Roger df)

```

184
185 Response: SIZE
186           F Df  Df.res    Pr(>F)
187 sex      65.21  1  96.204 1.945e-12 ***
188 latitude 156.55  1   4.480 0.0001179 ***
189

```

190

191

192

## SUPPLEMENTARY 5

193

### Test of genetic differentiation in the four traits

194

195

196 **#DEVELOPMENT TIME**

197

198

199

```
200 lmer(devtimeM ~ sex*region*treat + (0+sex|female)+ (1|pop) +
201 (1|treat:pop),na.action=na.exclude,data=cryp[cryp$region!="se.c",])->moddev
202
```

203 Random effects:

| Groups    | Name        | Variance  | Std.Dev. | Corr |
|-----------|-------------|-----------|----------|------|
| female    | sexf        | 1.742e-03 | 0.041737 |      |
|           | sexm        | 1.527e-03 | 0.039077 | 1.00 |
| treat:pop | (Intercept) | 2.127e-05 | 0.004612 |      |
| pop       | (Intercept) | 8.138e-05 | 0.009021 |      |
|           | Residual    | 2.976e-03 | 0.054553 |      |

210 Number of obs: 804, groups: female, 82; treat:pop, 10; pop, 5

211

212 Fixed effects:

|                           | Estimate  | Std. Error | t value |
|---------------------------|-----------|------------|---------|
| (Intercept)               | 1.098139  | 0.010743   | 102.221 |
| sexm                      | -0.019864 | 0.007667   | -2.591  |
| regionse.n                | 0.039274  | 0.015279   | 2.570   |
| treathigh                 | -0.176431 | 0.008564   | -20.601 |
| sexm:regionse.n           | 0.005638  | 0.011974   | 0.471   |
| sexm:treathigh            | 0.015170  | 0.010820   | 1.402   |
| regionse.n:treathigh      | -0.067391 | 0.012242   | -5.505  |
| sexm:regionse.n:treathigh | -0.024879 | 0.016572   | -1.501  |

222

223 Analysis of Deviance Table (Type II Wald F tests with Kenward-Roger df)

224

225 Response: devtimeM

|                  | F         | Df | Df.res | Pr(>F)        |
|------------------|-----------|----|--------|---------------|
| sex              | 13.4473   | 1  | 74.47  | 0.0004577 *** |
| region           | 0.0031    | 1  | 2.48   | 0.9599534     |
| treat            | 1606.6099 | 1  | 2.37   | 0.0002045 *** |
| sex:region       | 0.7272    | 1  | 77.98  | 0.3963910     |
| sex:treat        | 0.3101    | 1  | 721.29 | 0.5778202     |
| region:treat     | 56.6757   | 1  | 2.48   | 0.0090711 **  |
| sex:region:treat | 2.2387    | 1  | 725.86 | 0.1350316     |

234

235

236



```

237 #BODY MASS
238
239
240
241 lmer(massM^(1/3) ~ sex*region*treat + (0+sex|female)+ (1|pop)+
242 (1|treat:pop),na.action=na.exclude,data=cryp[cryp$region!="se.c",])-
243 >modmass
244
245 Random effects:
246   Groups      Name          Variance Std.Dev. Corr
247   female     sexf          1.154e-04 0.010744
248             sexm          1.547e-04 0.012438 1.00
249   treat:pop (Intercept) 9.430e-06 0.003071
250   pop       (Intercept) 0.000e+00 0.000000
251   Residual                    7.764e-04 0.027863
252 Number of obs: 742, groups:  female, 82;  treat:pop, 10;  pop, 5
253
254 Fixed effects:
255             Estimate Std. Error t value
256 (Intercept)      1.044570   0.003715 281.207
257 sexm             -0.035094   0.004100  -8.559
258 regionse.n      -0.021387   0.005442  -3.930
259 treathigh       -0.033930   0.004906  -6.916
260 sexm:regionse.n  0.015044   0.006338   2.374
261 sexm:treathigh  -0.005712   0.005774  -0.989
262 regionse.n:treathigh -0.017434  0.006875  -2.536
263 sexm:regionse.n:treathigh -0.002964  0.008727  -0.340
264
265 Analysis of Deviance Table (Type II Wald F tests with Kenward-Roger df)
266
267 Response: massM^(1/3)
268             F Df Df.res      Pr(>F)
269 sex          215.7233  1  73.88 < 2.2e-16 ***
270 region       40.9440  1   2.40 0.014729 *
271 treat       232.0320  1   2.51 0.001529 **
272 sex:region    9.3087  1  76.37 0.003136 **
273 sex:treat     2.5940  1 688.04 0.107730
274 region:treat  9.6962  1   2.52 0.066298 .
275 sex:region:treat 0.1141  1 689.65 0.735630
276
277
278
279

```

```

280 #WING LENGTH
281
282
283 lmer(WingM ~ sex*region*treat + (0+sex|female)+ (1|pop)+
284 (1|treat:pop),na.action=na.exclude,data=cryp[crp$region!="se.c",])-
285 >modwing
286
287 Random effects:
288   Groups      Name          Variance Std.Dev.  Corr
289   female     sexf          1.449e-04 1.204e-02
290             sexm          2.817e-04 1.678e-02 0.85
291   treat:pop (Intercept) 0.000e+00 0.000e+00
292   pop       (Intercept) 7.215e-11 8.494e-06
293   Residual                    1.182e-03 3.438e-02
294 Number of obs: 705, groups:  female, 82; treat:pop, 10; pop, 5
295
296 Fixed effects:
297
298             Estimate Std. Error t value
299 (Intercept)      1.061280   0.003673 288.916
300 sexm             -0.061635   0.005426 -11.359
301 regionse.n      -0.039091   0.005722  -6.832
302 treathigh       -0.031780   0.004756  -6.682
303 sexm:regionse.n  0.016428   0.008392   1.957
304 sexm:treathigh  -0.007690   0.007359  -1.045
305 regionse.n:treathigh -0.006330  0.007005  -0.904
306 sexm:regionse.n:treathigh -0.004863  0.011193  -0.434
307
308 Analysis of Deviance Table (Type II Wald F tests with Kenward-Roger df)
309
309 Response: WingM
310
310           F Df Df.res    Pr(>F)
311 sex           398.7165  1  73.78 < 2.2e-16 ***
312 region         84.2945  1   2.28 0.007618 **
313 treat        187.9537  1   2.09 0.004394 **
314 sex:region     5.3004  1  76.21 0.024052 *
315 sex:treat      3.0789  1 653.15 0.079785 .
316 region:treat   2.1331  1   2.36 0.263248
317 sex:region:treat 0.1861  1 655.63 0.666319
318
319
320

```

```

321 #METRIC SIZE
322
323 lmer(SIZE ~ sex*region*treat + (0+sex|female)+ (1|pop)+
324 (1|treat:pop),na.action=na.exclude,data=cryp[cryp$region!="se.c",])-
325 >modSIZE
326
327 Random effects:
328   Groups      Name          Variance Std.Dev. Corr
329   female     sexf          1.691e-04 0.013004
330             sexm          2.397e-04 0.015482 0.99
331   treat:pop (Intercept) 0.000e+00 0.000000
332   pop       (Intercept) 4.576e-05 0.006764
333   Residual                    9.130e-04 0.030216
334 Number of obs: 705, groups:  female, 82;  treat:pop, 10;  pop, 5
335
336 Fixed effects:
337             Estimate Std. Error t value
338 (Intercept)      1.0420952   0.0058980 176.686
339 sexm             -0.0251932   0.0046415  -5.428
340 regionse.n      -0.0384210   0.0082125  -4.678
341 treathigh       -0.0258973   0.0041923  -6.177
342 sexm:regionse.n -0.0003611   0.0071905  -0.050
343 sexm:treathigh  -0.0028792   0.0064776  -0.444
344 regionse.n:treathigh -0.0096801 0.0061860  -1.565
345 sexm:regionse.n:treathigh 0.0110025 0.0098529   1.117
346
347 Analysis of Deviance Table (Type II Wald F tests with Kenward-Roger df)
348
349 Response: SIZE
350             F Df Df.res      Pr(>F)
351 sex             94.7078  1  72.67 8.382e-15 ***
352 region          31.3393  1   2.69 0.015019 *
353 treat          143.3430  1   2.07 0.006021 **
354 sex:region       1.1554  1  75.48 0.285849
355 sex:treat        0.1473  1 648.36 0.701294
356 region:treat     1.1099  1   2.35 0.388220
357 sex:region:treat 1.2348  1 650.48 0.266889
358
359
360
361

```

362

## Supplementary 6

363

### Specification of Bayesian mixed effects model estimating G

364

365

```
prior2 = list(
```

366

```
R = list(
```

367

```
R1 = list(V = diag(0.0001, 4), nu = 4),
```

368

```
R2 = list(V = diag(0.0001, 4), nu = 4),
```

369

```
R3 = list(V = diag(0.0001, 4), nu = 4),
```

370

```
R4 = list(V = diag(0.0001, 4), nu = 4)),
```

371

372

```
G = list(
```

373

```
G1 = list(V = diag(0.0001, 4), nu = 4, alpha.V=diag(4)*1000, alpha.mu=rep(0,4)),
```

374

```
G2 = list(V = diag(0.0001, 4), nu = 4, alpha.V=diag(4)*1000, alpha.mu=rep(0,4)),
```

375

```
G3 = list(V = diag(0.0001, 4), nu = 4, alpha.V=diag(4)*1000, alpha.mu=rep(0,4)),
```

376

```
G4 = list(V = diag(0.0001, 4), nu = 4, alpha.V=diag(4)*1000, alpha.mu=rep(0,4))
```

377

```
))
```

378

379

```
modmulti2 <- MCMCglmm(cbind(devtimeM,SIZE,WingM, massM^(1/3)) ~
```

380

```
trait*sex*pop*treat ,
```

381

382

```
random = ~
```

383

```
us(trait:at.level(region, "se.n"):at.level(treat, "high")):female +
```

384

```
us(trait:at.level(region, "se.n"):at.level(treat, "central")):female +
```

385

```
us(trait:at.level(region, "pl"):at.level(treat, "high")):female +
```

386

```
us(trait:at.level(region, "pl"):at.level(treat, "central")):female ,
```

387

388

```
rcov = ~
```

389

```
us(trait:at.level(region, "se.n"):at.level(treat, "high")):units +
```

390

```
us(trait:at.level(region, "se.n"):at.level(treat, "central")):units +
```

391

```
us(trait:at.level(region, "pl"):at.level(treat, "high")):units +
```

392

```
us(trait:at.level(region, "pl"):at.level(treat, "central")):units ,
```

393

```
data = cryp3,
```

394

```
family = rep("gaussian",4), prior = prior2, nitt=55000,slice=TRUE,
```

395

```
burnin=5000, thin=50, verbose = T, pr=TRUE)
```

396

397

398

399

## Supplementary 7

400

### G-matrix summaries

401

402 **Supplementary Table 7a:** Bayesian posterior estimates of mean-standardized broad sense genetic  
 403 variance and heritability for each of the four traits. The trace of each G-matrix (i.e. summed diagonal  
 404 elements) is given with 95% credible intervals within parentheses. Dimensionality of G and the  
 405 genetic correlation matrix (R) is given by the percent of total variance explained by the first eigen  
 406 vector ( $G_{\max}$  and  $R_{\max}$ , respectively). For  $G_{\max}$ , values within parentheses given the corresponding  
 407 value for variance standardized G-matrix.

| Origin | Photoperiod      | Genetic Variance |      |       |      | Broad sense heritability |      |       |      | Trace         | % $G_{\max}$ | % $R_{\max}$ |
|--------|------------------|------------------|------|-------|------|--------------------------|------|-------|------|---------------|--------------|--------------|
|        |                  | DEV              | SIZE | WING  | MASS | DEV                      | SIZE | WING  | MASS |               |              |              |
| North  | Northern (long)  | 2.35             | 0.18 | 0.20  | 0.10 | 0.92                     | 0.30 | 0.30  | 0.22 | 2.9 (1.3-4.3) | 81 (57)      | 80           |
| North  | Southern (short) | 2.35             | 0.39 | 0.002 | 0.21 | 1.12                     | 0.62 | 0.003 | 0.48 | 3.0 (2.0-6.2) | 83 (51)      | 74           |
| South  | Northern (long)  | 3.54             | 0.03 | 0.29  | 0.05 | 1.38                     | 0.06 | 0.55  | 0.22 | 3.9 (2.1-5.3) | 90 (64)      | 82           |
| South  | Southern (short) | 1.70             | 0.22 | 0.20  | 0.24 | 0.88                     | 0.40 | 0.43  | 0.67 | 2.3 (1.2-4.2) | 76 (59)      | 90           |

408

409

410

411 **Supplementary Table 7b:** Best Bayesian posterior estimates of  $G_{\max}$  and  $R_{\max}$  (i.e. the first  
 412 eigenvectors of the variance standardized G-matrix and the genetic correlation matrix, respectively).  
 413 Vector loadings of  $G_{\max}$  (above) and  $R_{\max}$  (below) are given to the left, and vector correlations  
 414 indicating similarity among  $G_{\max}$  or  $R_{\max}$  across latitudes and photoperiod treatments are given to the  
 415 right. The diagonal elements in bold font to the right give the eigen-value of  $G_{\max}$  and  $R_{\max}$ ,  
 416 respectively, for each of the four latitude:photoperiod combinations.

417

| Origin                                    | Photoperiod      | Group | $G_{\max}/R_{\max}$ Loadings |       |       |       | Vector Correlations |             |             |             |  |
|-------------------------------------------|------------------|-------|------------------------------|-------|-------|-------|---------------------|-------------|-------------|-------------|--|
|                                           |                  |       | DEV                          | SIZE  | WING  | MASS  | $N_N$               | $N_S$       | $S_N$       | $S_S$       |  |
| <i>Variance Standardized G-matrix (G)</i> |                  |       |                              |       |       |       |                     |             |             |             |  |
| North                                     | Northern (long)  | $N_N$ | 0.88                         | 0.21  | 0.18  | 0.38  | <b>0.73</b>         | 0.84        | 0.96        | 0.23        |  |
| North                                     | Southern (short) | $N_S$ | 0.99                         | -0.09 | 0.001 | -0.04 | 0.84                | <b>0.78</b> | 0.89        | 0.32        |  |
| South                                     | Northern (long)  | $S_N$ | 0.91                         | 0.16  | 0.34  | 0.17  | 0.96                | 0.89        | <b>0.89</b> | 0.13        |  |
| South                                     | Southern (short) | $S_S$ | 0.25                         | -0.57 | -0.44 | -0.64 | 0.23                | 0.32        | 0.13        | <b>0.95</b> |  |
| <i>Genetic Correlation Matrix (R)</i>     |                  |       |                              |       |       |       |                     |             |             |             |  |
| North                                     | Northern (long)  | $N_N$ | 0.36                         | 0.49  | 0.54  | 0.58  | <b>2.74</b>         | 0.89        | 0.99        | 0.87        |  |
| North                                     | Southern (short) | $N_S$ | -0.10                        | 0.53  | 0.57  | 0.62  | 0.89                | <b>2.09</b> | 0.86        | 1           |  |
| South                                     | Northern (long)  | $S_N$ | 0.42                         | 0.56  | 0.47  | 0.54  | 0.99                | 0.86        | <b>2.81</b> | 0.84        |  |
| South                                     | Southern (short) | $S_S$ | -0.14                        | 0.59  | 0.56  | 0.56  | 0.87                | 1           | 0.84        | <b>2.65</b> |  |

418

419
